# Supplementary material
Source: MDPI journal article supplement (https://www.mdpi.com/2504-3900/78/1/41)
Supplement: s1 [file s1]

## NOVEL STRATEGY FOR THE FORMULATION OF POORLY WATER-SOLUBLE DRUGS: NYSTATIN MICROENCAPSULATION.

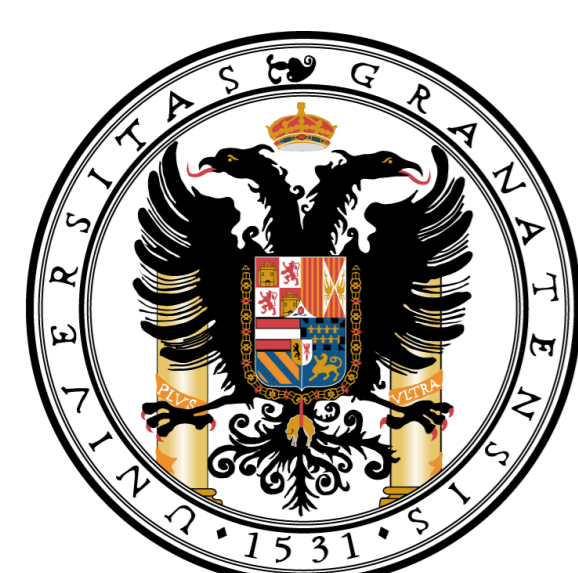

N. Pérez-González<sup>1</sup>, M.J. Martín-Villena<sup>1</sup>, A.C. Calpena-Campmany<sup>3</sup>, J.A Morales-Molina<sup>4</sup>, B. Clares-Naveros<sup>1-2</sup>

1. Department of Pharmacy and Pharmaceutical Technology, Faculty of Pharmacy, University of Granada, Granada, Spain

2. Department of Pharmacy and Pharmaceutical Technology and Physical Chemistry, Faculty of Pharmacy and Food Sciences, University of Barcelona, Barcelona, Spain

3. Pharmacy Department, Torrecárdenas Hospital, Almería, Spain

4. Biomedical Research Institute ibs.Granada., Granada, Spain

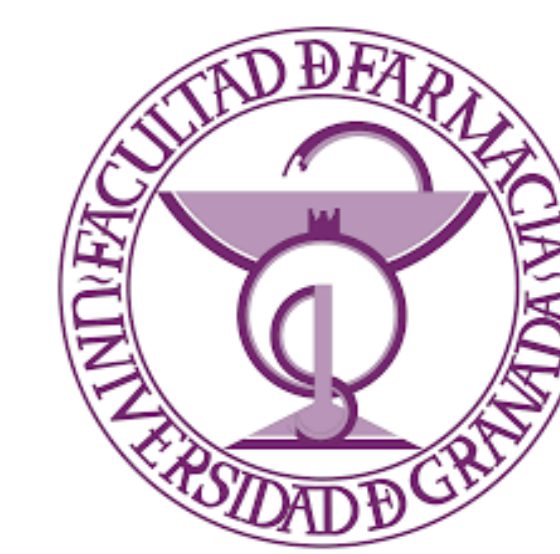

### Introduction.

In recent years, a growing concern about resistance to anti-infective agents has emerged. One of the most common microbial agents is:

*Candida albicans*

Can cause infections of skin and mucosal tissues

Treatment

NYSTATIN

**PROBLEMS**  
Photosensitive  
Very poorly soluble in aqueous media  
Poor absorption

**SOLUTION<sup>1-2</sup>**

**MICROENCAPSULATION**

### Objetive.

Design, develop and characterize two types of microparticles as appropriate nystatin delivery systems for topical use: alginate microparticles (AM) and chitosan coated alginate microparticles (CCM).

### Materials and methods<sup>3</sup>.

#### Synthesis of microparticles.

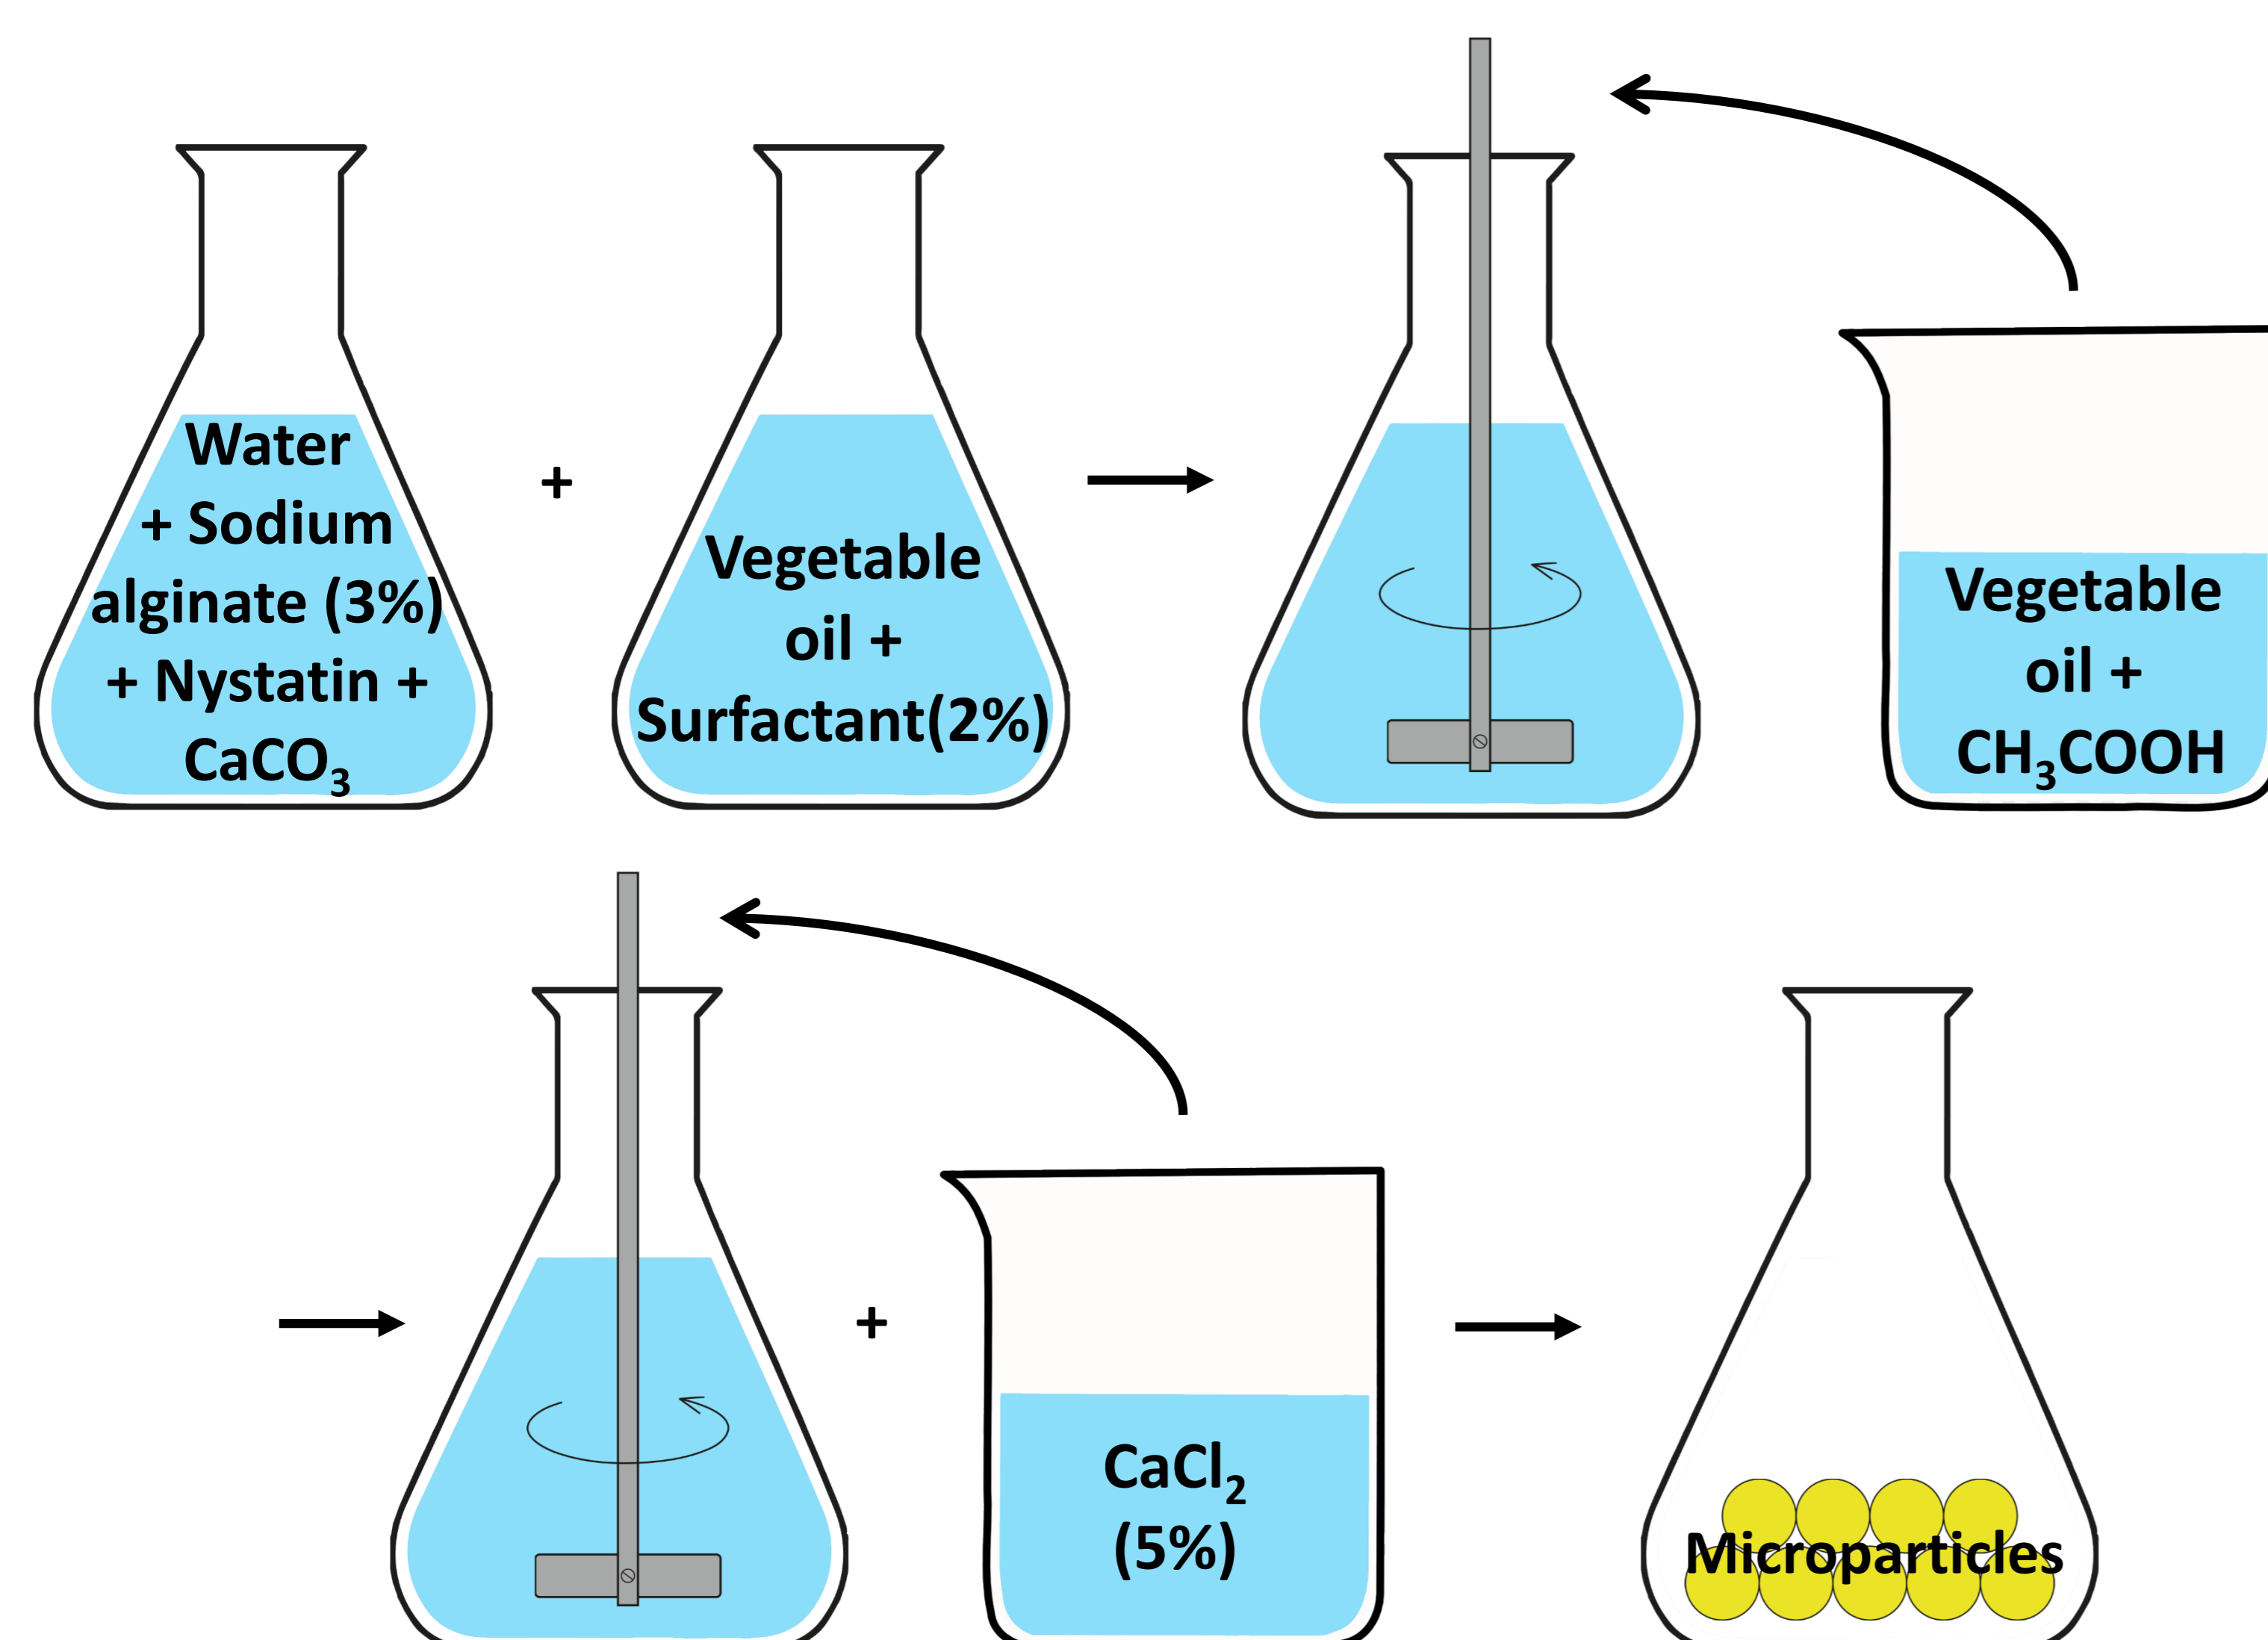

#### Coating procedure.

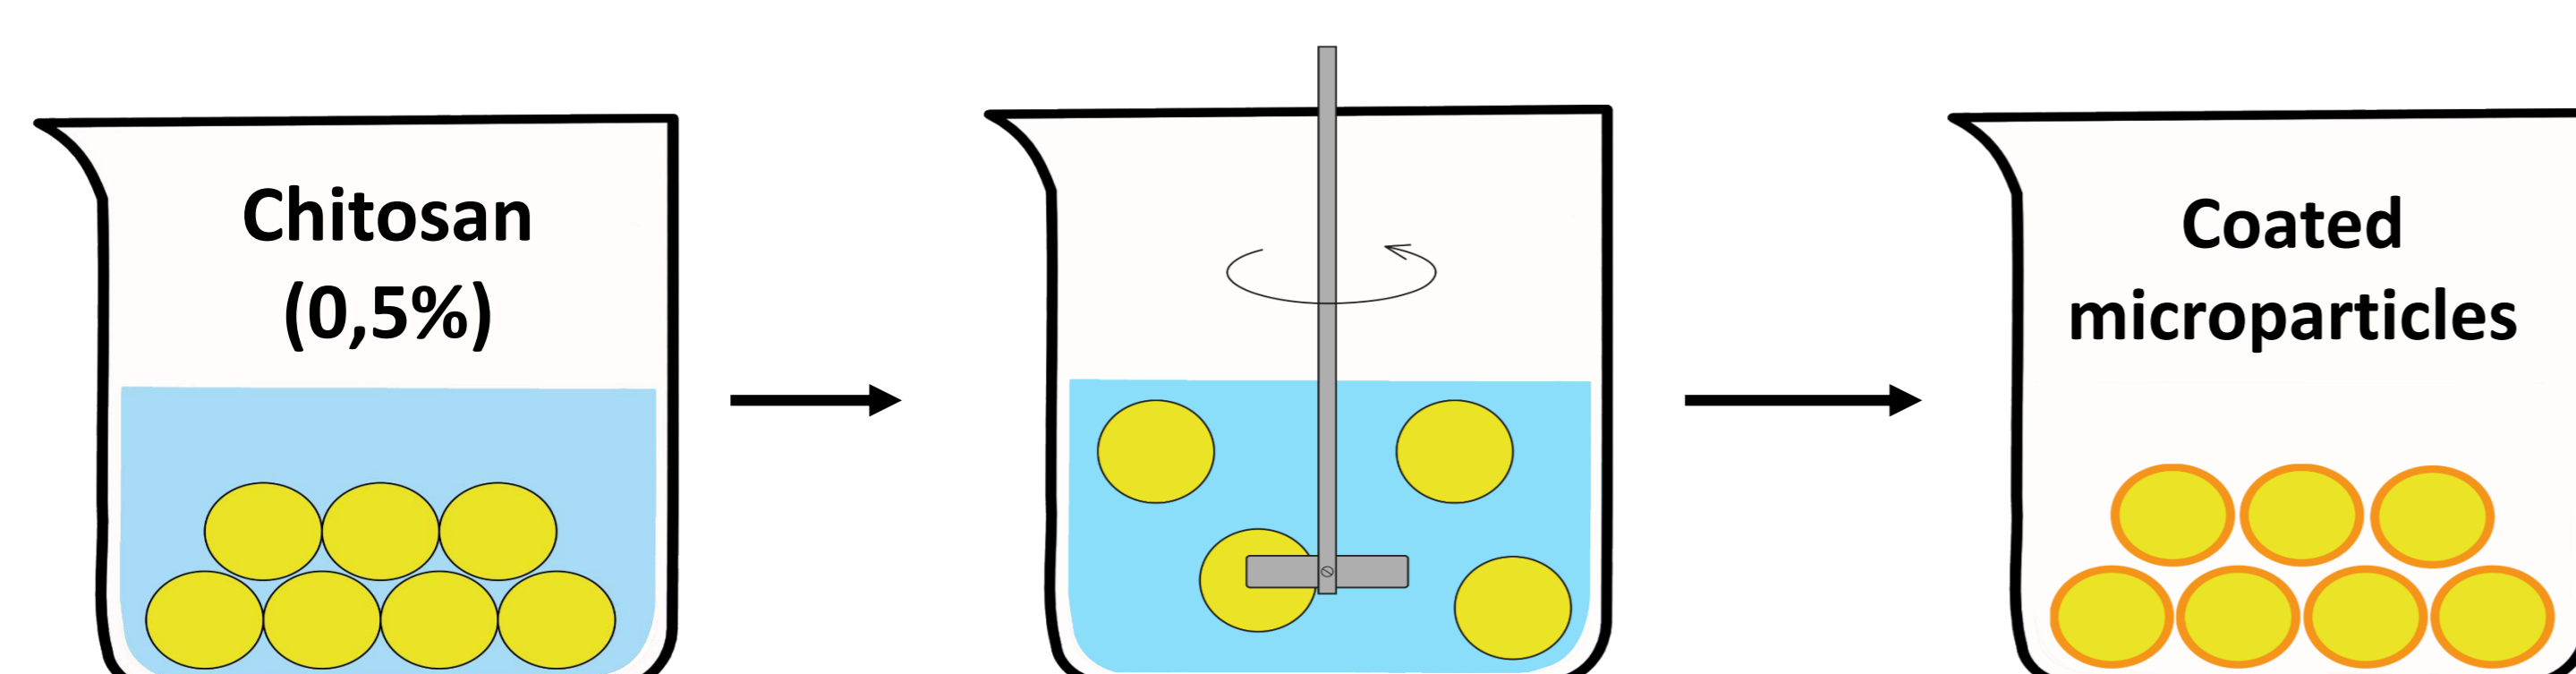

### Results.

|                         |         | AM    | CCM   |
|-------------------------|---------|-------|-------|
| Mean particle size (µm) |         | 51,21 | 57,20 |
| PY (%)                  |         | 83,26 | 79,67 |
| LD (%)                  | Inside  | 6,78  | 4,87  |
|                         | Surface | 0,40  | 0,91  |
| EE (%)                  | Inside  | 81,12 | 85,08 |
|                         | Surface | 12,07 | 9,18  |

Table 1. Mean particle size and average percentage yield (PY), loading capacity (LD) and encapsulation efficiency (EE).

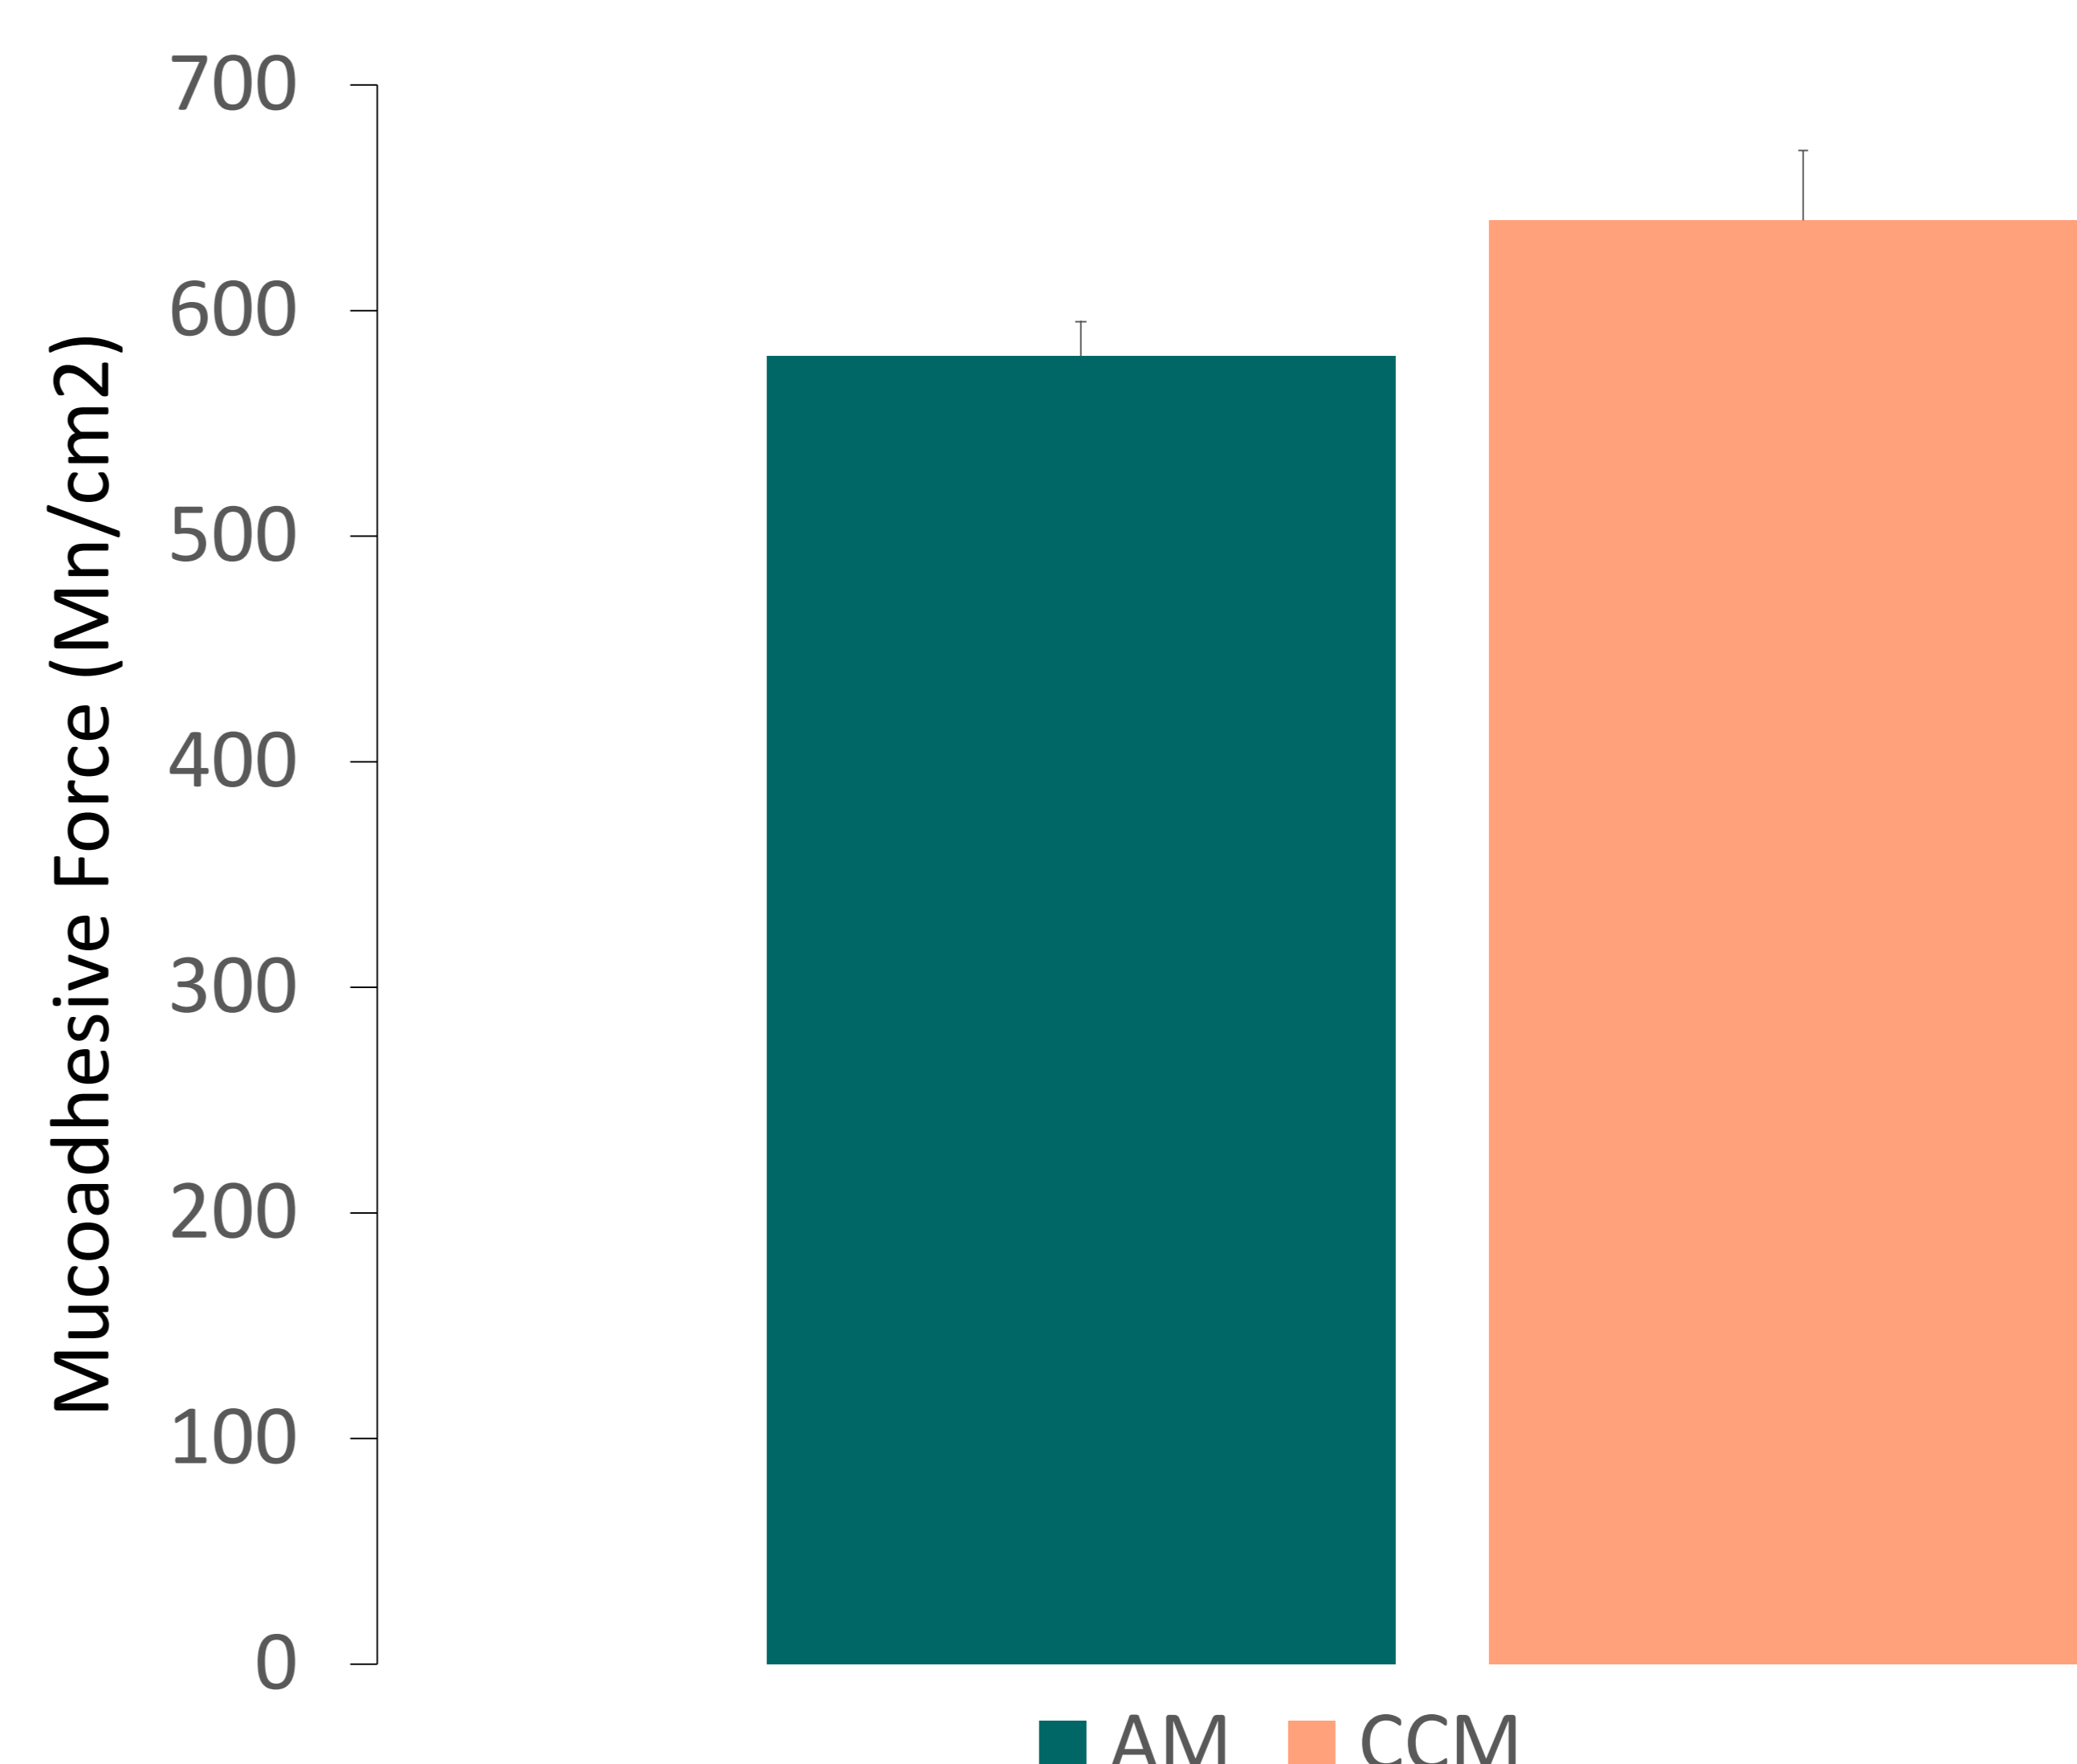

Fig. 2. Mucoadhesive force for alginate microparticles (AM) and chitosan coated microparticles.

CCM was the system that exhibited the best mucoadhesive properties.

### Conclusions.

The ability of these systems to adhere mucous membranes has great appeal for the treatment of localized infections. Thus these microparticulate systems could be proposed as a suitable vehicle for this kind of mucosal infections being an alternative therapy.

### References.

- Offner, F., Krcmery, V., Boogaerts, M., Doyen, C., Engelhard, D., Ribaud, P., et al. (2004). Liposomal nystatin in patients with invasive aspergillosis refractory to or intolerant of amphotericin B. *Antimicrobial Agents and Chemotherapy*, 48, 4808–4812.
- Agarwal, S., Thakur, K., Kanga, A., Singh, G., & Gupta, P. (2008). Catheter-related candidemia caused by *Candida lipolytica* in a child with tubercular meningitis. *Indian Journal of Pathology and Microbiology*, 51, 298–300.
- Silva, C. M., Ribeiro, A. J., Ferreira, D., & Veiga, F. (2006). Insulin encapsulation in reinforced alginate microspheres prepared by internal gelation. *European Journal of Pharmaceutical Sciences*, 29, 148–159.
